# Supplementary material
Source: Springer Nature journal article supplement (https://www.springermedizin.de/resource/supplementary/13058_2013_3594_MOESM5_ESM.pdf/9703908)

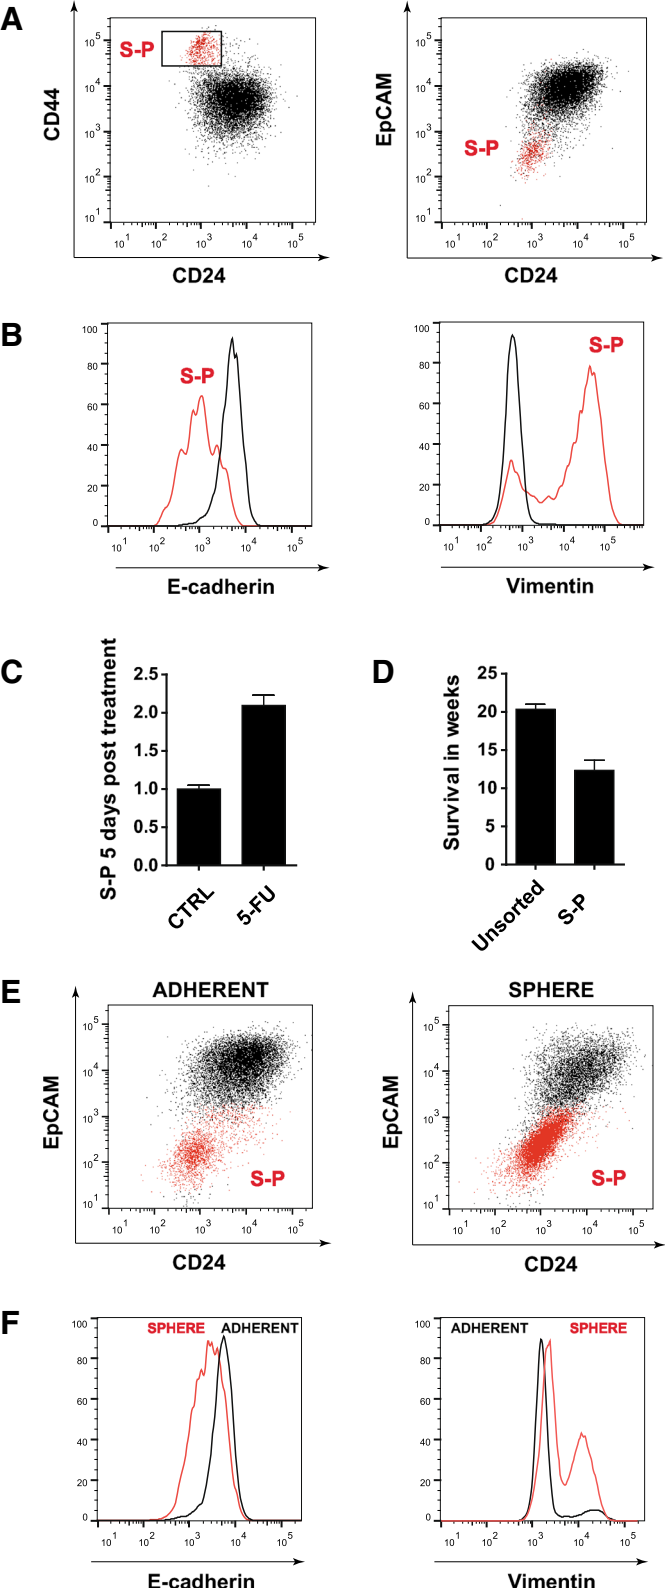

Supplement: MOESM5 [file 9703908]
